# Supplementary material
Source: PubMed Central journal article supplement (PMC3107306)
Supplement: 1101914108_pnas.201101914SI.pdf [file 1101914108_pnas.201101914SI.pdf]

# Supporting Information

Mohajerani et al. 10.1073/pnas.1101914108

## SI Methods

**Animal Model.** Adult male C57BL6J mice were used ( $n = 32$ ) for most experiments, whereas I/LnJ acallosal mice ( $n = 7$ ; Jackson Laboratory) were used for a subset of these experiments. Animal protocols were approved by the University of British Columbia Animal Care Committee. Anesthesia was induced with urethane (0.12% wt/wt), and body temperature was maintained at  $37 \pm 0.5^\circ\text{C}$  with the use of a feedback-controlled heating pad. A large ( $7 \times 8$  mm; bregma 2.5 to  $-4.5$  mm and lateral 0–4 mm) bilateral cranial window was surgically created, and the dura matter was carefully removed to expose a large region of cortex as described (1).

**Voltage-Sensitive Dye Imaging.** For in vivo voltage-sensitive dye (VSD) imaging, the dye, RH1692 (Optical Imaging) (2), was dissolved in the Hepes-buffered saline: optical density of 5–7 (measured at 550 nm) was applied to the exposed cortex for 60–90 min. To minimize movement artifacts caused by respiration, the brain was covered with 1.5% agarose made in Hepes-buffered saline and sealed with a glass coverslip. Respiratory rhythm was measured using a motion sensor and indicated no contribution of breathing-induced hemodynamic signals or motion artifacts to VSD signals (1). For VSD data collection, 12-bit images were captured with either 5- or 6.67-ms resolution with a CCD camera (1M60 Pantera; Dalsa) and an EPIX E1DB frame grabber with XCAP 3.1 imaging software (EPIX, Inc.). VSD was excited with a red LED (627-nm center; Luxeon K2) and fluorescence filters as described (1). Images were taken through a macroscope composed of front to front video lenses ( $8.6 \times 8.6$ -mm field of view,  $67 \mu\text{m}/\text{pixel}$ ). To measure cortical activity evoked by sensory stimulation, we stimulated the hind- and forelimbs using a piezoelectric device (Q220-AY-203YB; Piezo Systems) using single 5-ms taps.

**Mini-Stroke Procedure.** Focal photothrombotic stroke was targeted to a single surface arteriole within the right hemisphere forelimb somatosensory cortex as described (3–5). The arteriole was selected based on its appearance and position within the anterior segment of the forelimb somatosensory VSD map. To induce occlusion, we injected the photosensitizer Rose Bengal ( $\text{Na}^+$  salt, R3877; Sigma) diluted to 10 mg/mL in Hepes buffered saline into the tail vein at  $30 \mu\text{g}/\text{g}$  mouse body weight. Within 10 min of injection, an individual surface arteriole (averaging  $28.9 \pm 1.6 \mu\text{m}$  in diameter,  $n = 25$ ) (Fig. S1) was targeted for occlusion using 0.7–1.4 mW of 532-nm laser light (MGM-20; Beta Electronics). The laser was coupled through the microscope's epifluorescence light path and focused to a spot through a  $40 \times 0.8$ -NA water immersion lens as described (3). The targeted arteriole was illuminated until a stable clot formed.

**Speckle Imaging.** To confirm occlusion of targeted arterioles, we examined cortical blood flow with laser speckle contrast imaging (6) as previously described (3). For illumination, a 784-nm 32-mW StockerYale SNF-XXX-785S-35 laser (Stocker & Yale) with an Edmund anamorphic beam expander T47274 (Edmund Optics) was held directly on a micromanipulator at an angle of  $30^\circ$ , directed at the brain surface that was enclosed by a coverslip and agarose, and viewed with a  $4 \times 0.075$ -NA objective. We recorded images with a Dalsa 1M60 Pantera camera (Dalsa) mounted on the upright microscope used for photoactivation. We collected 50 image time sequences at 10 Hz by using 10-ms exposures. Individual images of variance were created in ImageJ (National Institutes of Health) using its 2D variance filter ( $3 \times 3$ - or  $5 \times 5$ -pixel kernel size,  $3.47 \mu\text{m}/\text{pixel}$ ). After variance filtering, all images were averaged, and a

single 32-bit image of the SD was produced by taking the square root of the averaged variance image. The SD image was then divided by the mean of all of the raw images to help correct for uneven illumination and create an image of speckle contrast (SD/mean).

**Data Analysis.** VSD responses to sensory-evoked stimulation were calculated as the normalized difference to the average baseline recorded before stimulation ( $\Delta F/F_0 \times 100$ ) using custom-written code in Matlab (Mathworks) or ImageJ (National Institutes of Health).

To quantify the spread of sensory-evoked signal over the cortex, both cortical hemispheres were divided into 10 distinct regions (square regions of  $0.11 \text{ mm}^2$ ), including (i) anterior cingulate (dorsal part) and anterior segment of secondary motor cortex ( $\text{M2}_A$ ), (ii) forelimb primary somatosensory cortex (FL), (iii) anterior cingulate (dorsal and ventral part) and posterior segment of secondary motor cortex ( $\text{M2}_P$ ), (iv) hindlimb somatosensory cortex (HL), (v) C2 primary barrel cortex, (vi) parietal association cortex (ptA), (vii) retrosplenial cortex (RS), (viii) primary visual cortex (V1), (ix) secondary visual cortex (V2), and (x) primary motor cortex (M1). All cortical regions were identified based on stereotaxic coordinates (7) and their stereotyped position relative to the functionally defined hindlimb (HL) area. In all experiments, the functional locations of the left and right forelimb maps were confirmed using forelimb-evoked VSD responses.

To assess stroke size, maps of blood flow change were created by measuring the difference in speckle signals in both cortical hemispheres before, and after targeted ischemia to individual pial arterioles that supplied the right primary forelimb sensory representation. Thresholding (50% of the maximal laser speckle contrast value) was used to define the map borders (4, 8). For consistency, we excluded experiments in which the area covered by stroke was larger than  $1 \text{ mm}^2$ . No changes were observed in the blood flow map in the contralesional hemisphere.

**Cortical EEG Recording.** A Teflon-coated chlorided silver wire (0.125 mm) was placed on the cortical surface. A reference electrode was placed on the nasal bone. The cortical signal was amplified and filtered (0–1,000 Hz) using a DC amplifier.

**Local Field Potential Recording.** The local field potential (LFP) was recorded by inserting a glass pipette (5–10 M $\Omega$ ) into either the center of primary forelimb cortex (at 250–500  $\mu\text{m}$  depth) or within one of three thalamic nuclei (the ventral posterolateral, the ventral posteromedial, or the posterior medial nucleus). The signal was amplified by an Axopatch 200A (Axon Instruments) and filtered from DC to 1,000 Hz. The forelimb cortex was identified based on the VSD fluorescence signal. The thalamic nuclei were localized based on stereotaxic coordinates (7) and their stereotyped position relative to the bregma. The recording positions were confirmed by recording the extracellular synaptic potentials evoked by stimulating the contralateral forelimb.

**Local Pharmacology.** Local silencing was performed by pressure injection (30–60 s, 20–40 psi, Picospritzer II; General Valve) of  $\sim 0.12 \mu\text{L}$  30  $\mu\text{M}$  tetrodotoxin dissolved in an artificial cerebrospinal fluid (ACSF) solution.

**Statistical Analysis.** One-way ANOVA analysis, adjusted by Bonferroni corrections, was used to compare the amplitude, time to peak, and integral of the VSD-evoked response. All  $P$  values  $\leq 0.05$  were considered statistically significant ( $*P < 0.05$ ;  $**P < 0.01$ ;  $***P < 0.001$ ). All of the data are expressed as mean  $\pm$  SE.



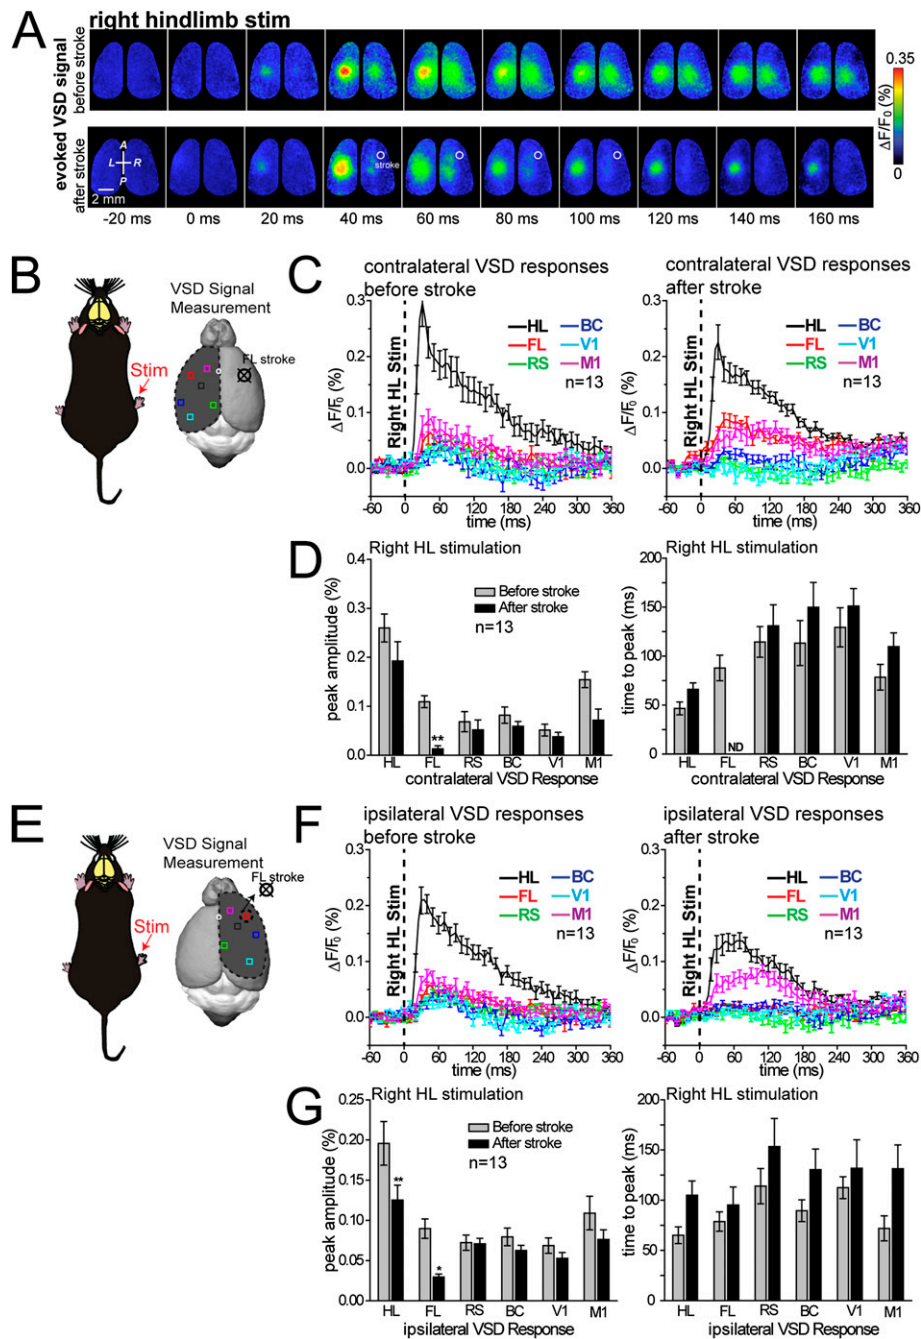

**Fig. 52.** Stroke in forelimb region did not lead to interhemispheric rearrangements of hindlimb sensory-evoked activity. (A) Montage of VSD fluorescence signal in response to tactile stimulation of the right hindlimb in control (Upper) and 40 min (Lower) after creation of photothrombotic stroke within the right forelimb map outlined with white circles. (B) Schematic showing the location of regions of interest within the unaffected hemisphere used for assessing responses to the right hindlimb. (C) Plots of average VSD response measured within the nonaffected hemisphere (stroke in other hemisphere). (D) Quantification of the VSD signal response peak amplitude and time to peak in C. Note that right HL stimulation-evoked contralateral signals were unchanged within the stroke-unaffected hemisphere. (E) Cartoon showing the regions of interest within affected hemispheres that were used for assessing responses to the right hindlimb. (F and G) Same as C and D except that the VSD signals were measured within the stroke-affected hemisphere ( $n = 13$  mice;  $*P < 0.05$ ;  $**P < 0.01$ ;  $***P < 0.005$ ).









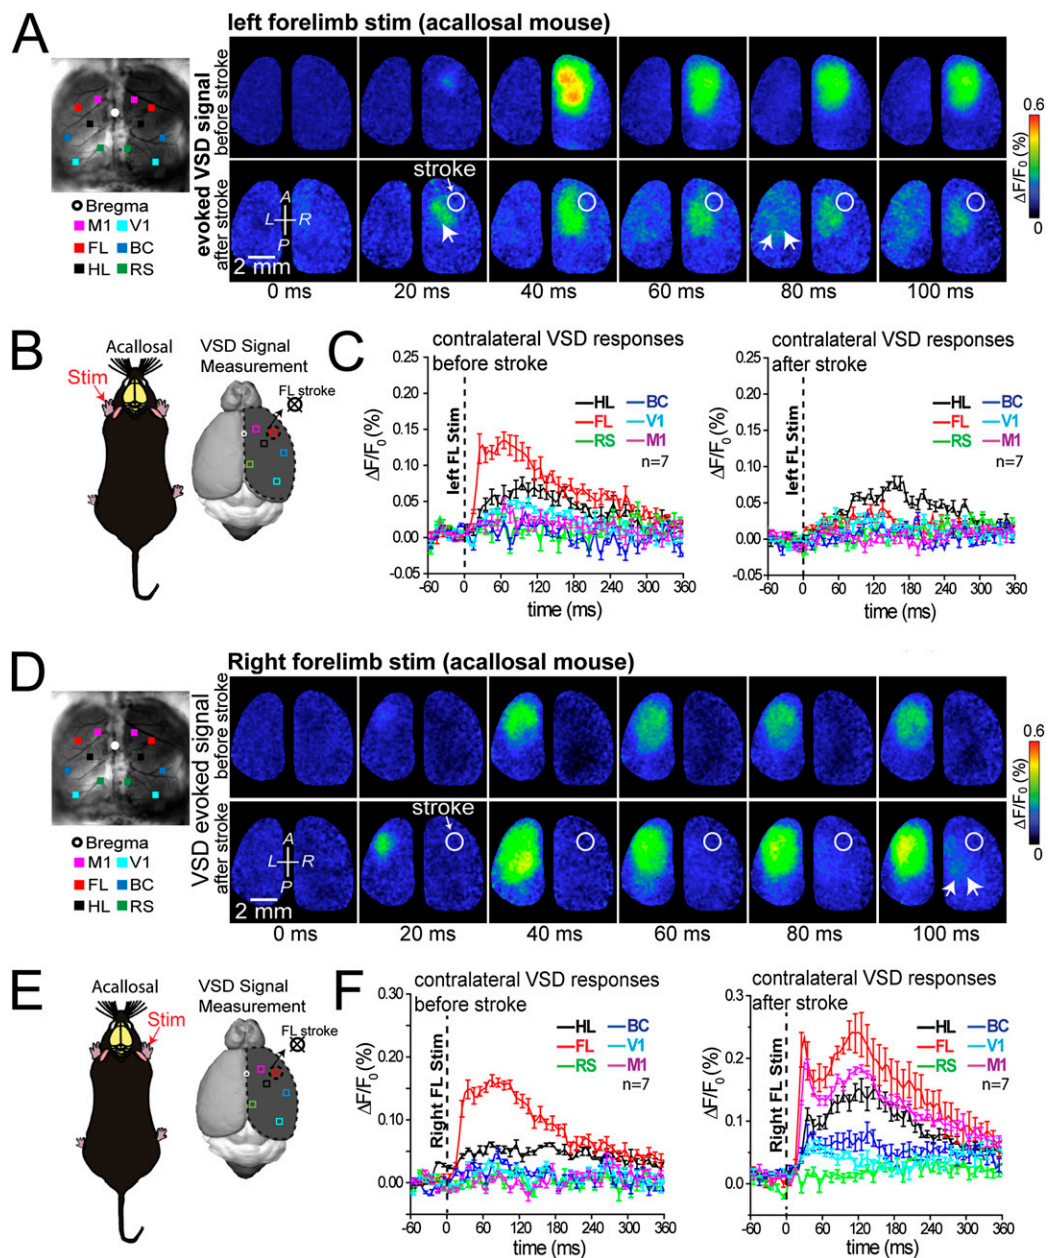

**Fig. S6.** Bilateral changes in sensory processing in response to stroke are apparent in *l/l* acallosal mice. (*A Left*) Targeted ischemia was made as in Fig. 1. (*A Upper Right*) Images of left forelimb-stimulated sensory responses before and 40 min after targeted ischemia (*Lower Right*) (stroke focus outlined in white) to the right hemisphere forelimb map. (*B and C*) Regions of interest and quantitative data ( $n = 7$ ) for stimulation of the stroke-affected paw and measurement of responses within the stroke-affected hemisphere. (*D*) Images of sensory response mediated by stimulation as in *A* but from the unaffected forelimb of an acallosal mouse before and after ischemic stroke. (*E and F*) Regions of interest and quantification of responses within the unaffected hemisphere mediated by the unaffected forelimb (right) 40 min after targeted stroke in acallosal mice ( $n = 7$ ). Contralateral VSD signals measured over several cortical regions in responses to left forelimb stimulation changed significantly after focal stroke.
